# Supplementary material for: Assessment of the potential of novel and classical opioids to induce respiratory depression in mice
Source: PubMed Central journal article supplement (PMC10952895; doi:10.1111/bph.16199), 2023-08-22
Supplement: BPH-180-3160-s001.pdf [file BPH-180-3160-s001.pdf]

# Supp Fig 1

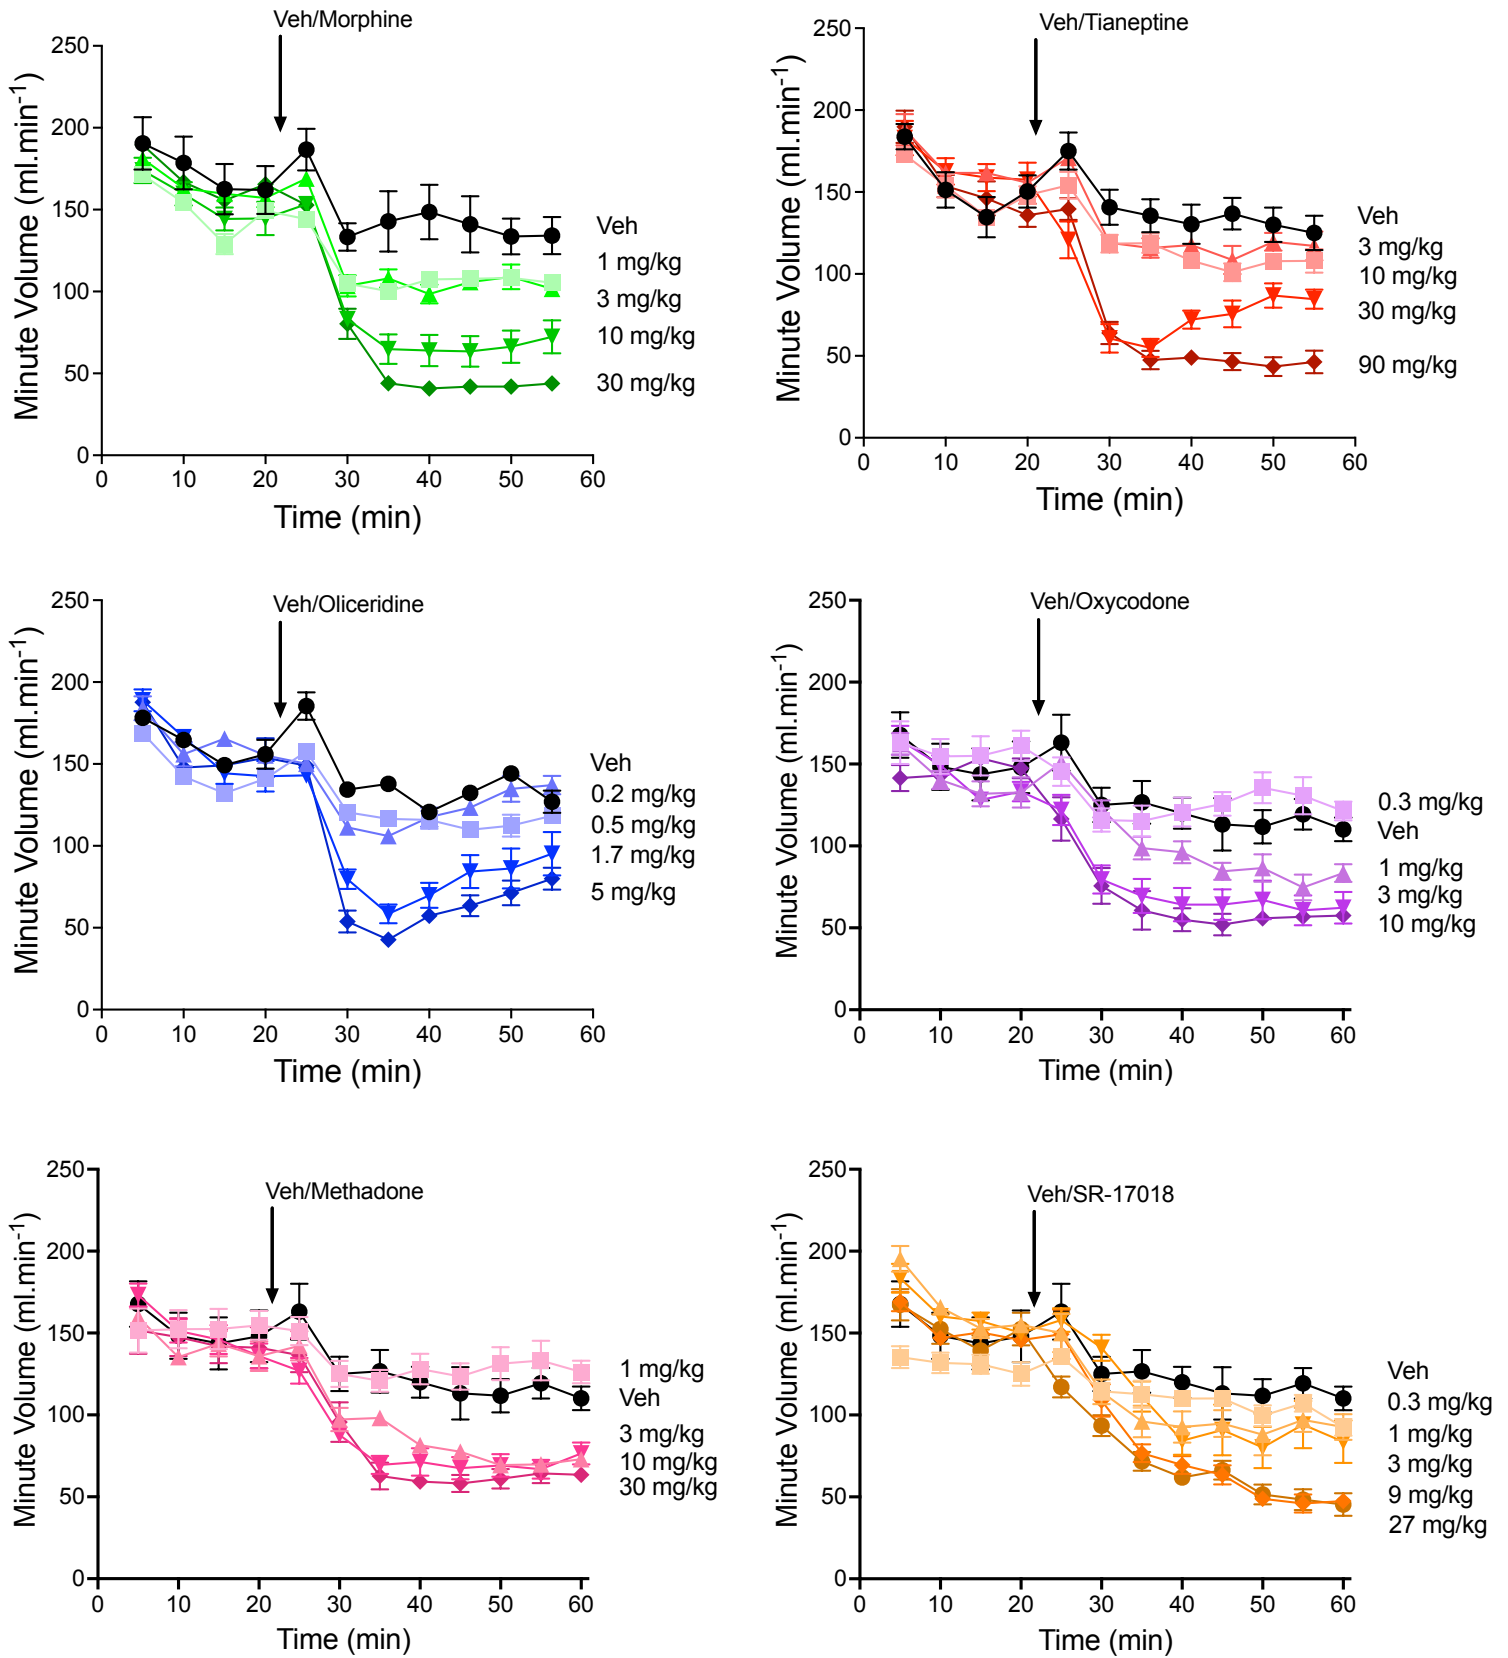

**Supplementary Figure 1.** Raw minute volume (mL.min<sup>-1</sup>) values for morphine, tianeptine, oliceridine, SR-17018, methadone and oxycodone dose response curves shown as percent of baseline MV in Figure 1 and Figure 2. N=6 for all groups.

A

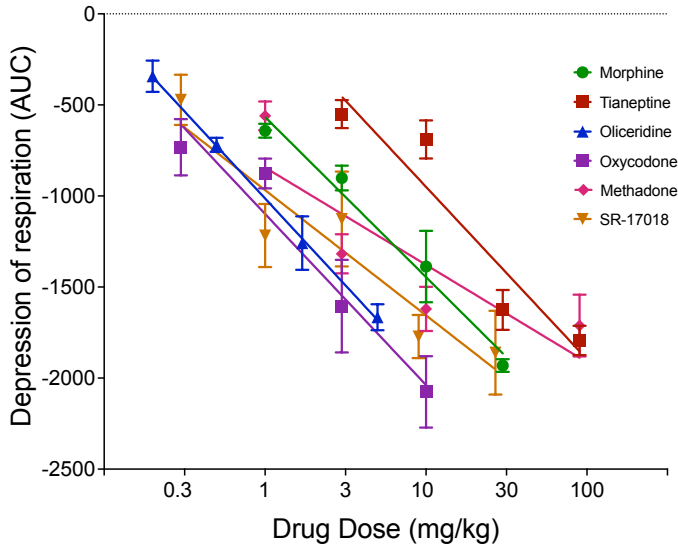

B

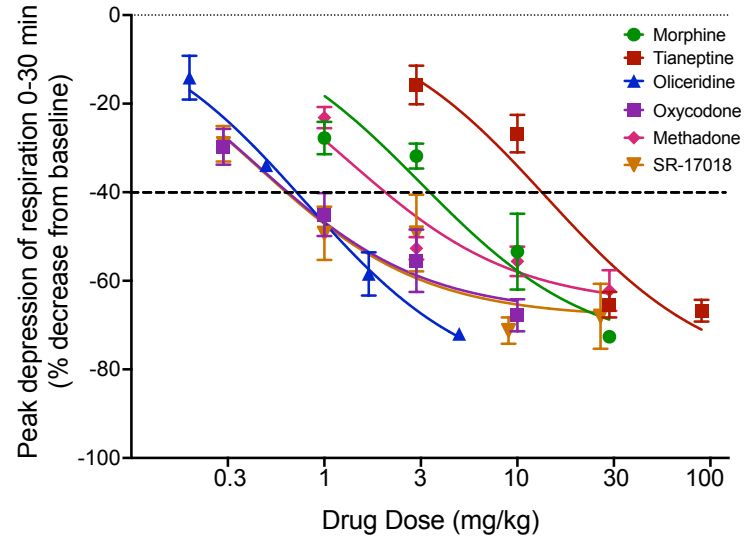

**Supplementary Figure 2.** (A) Alternative regressions fit using AUC instead of maximum respiratory depression shown in Fig 3A. (B) Sigmoidal 3-parameter fit of Fig 3A. N=6 for each data point.

A

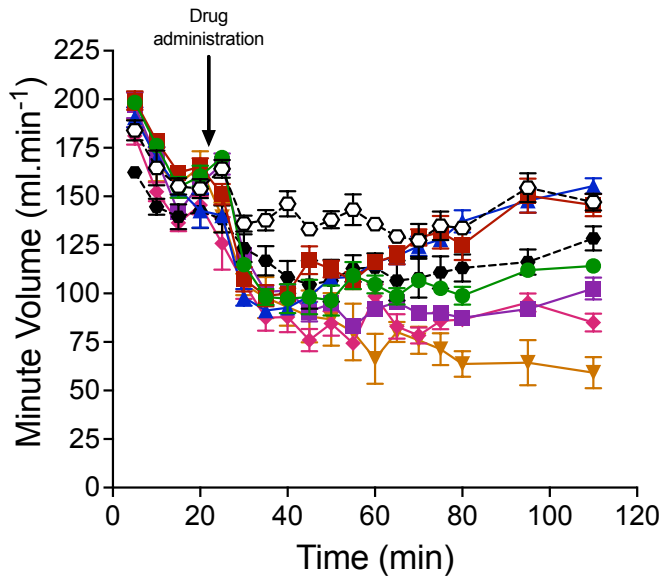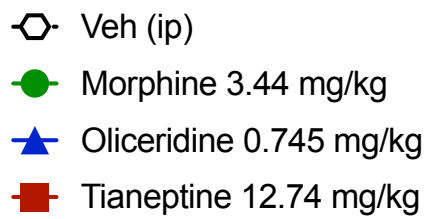

B

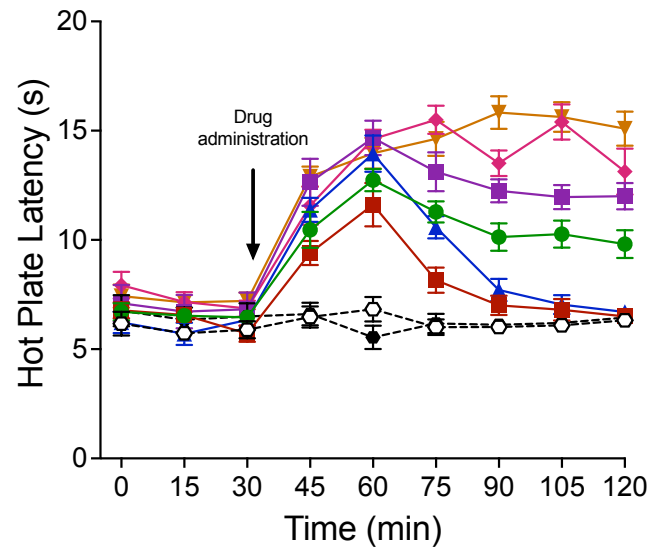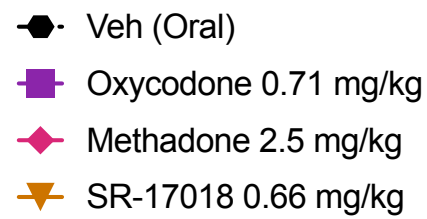

**Supplementary Figure 3.** Raw minute volume ( $\text{mL}\cdot\text{min}^{-1}$ ) (A) and raw hot plate latency (seconds) (B) values for morphine, tianeptine, oliceridine, SR-17018, methadone and oxycodone dose response curves shown as percent of baseline MV in Figure 3 or as %MPE in Figure 4, respectively. N=6 and N=10 for plethysmography and hot plate, respectively.

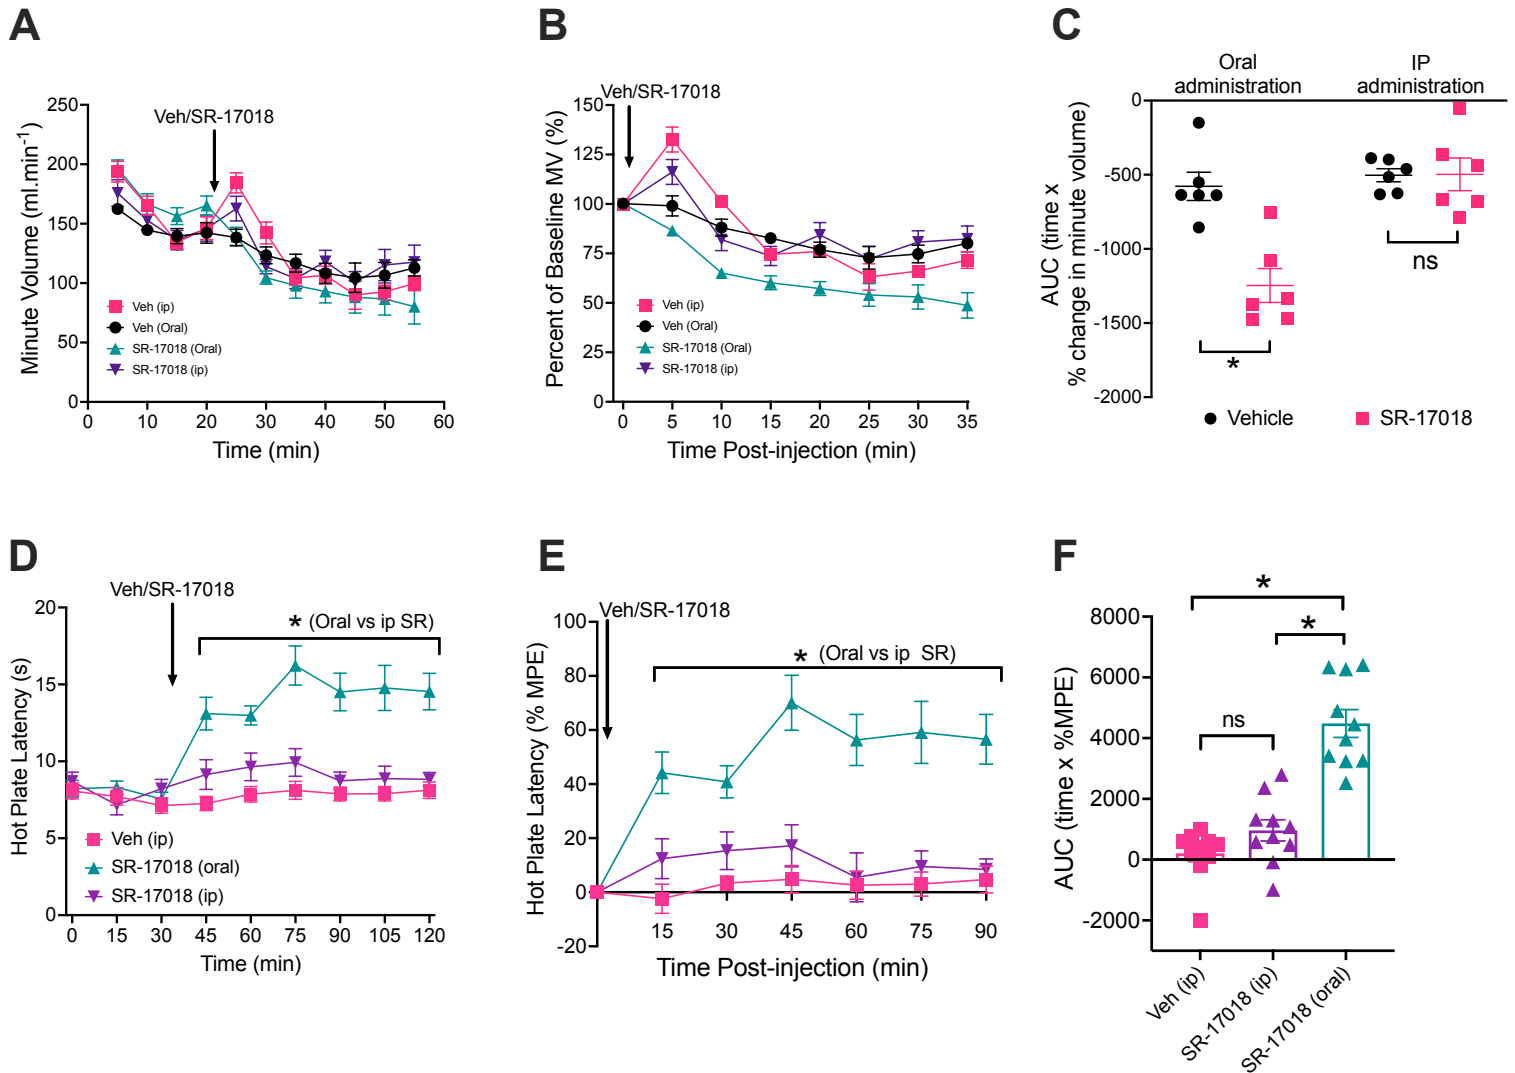

**Supplementary Figure 4.** (A) Raw minute volume ( $\text{mL}\cdot\text{min}^{-1}$ ) and percent of baseline (B) values for mice administered SR-17018 0.66 mg/kg by oral or i.p administration and respective vehicles. (C) AUC analysis of (B) shows significant depression of respiration by oral but not i.p administered SR-17018. (D) Raw hot plate latency (sec) and % maximum possible effect (%MPE) (E) for mice administered SR-17018 0.66 mg/kg by oral or i.p administration or vehicle. (F) AUC analysis of (E) shows significant antinociception by oral but not i.p. SR-17018 Comparisons in (C-E) made by Two-way ANOVA with Tukey's comparison. Comparison in (F) made by One-way ANOVA with Tukey's comparison). \* indicates  $p < 0.05$ .  $N=6$  for (A-C) and  $N=10$  (D-E). Statistical test details are provided in Supplementary Table 2.

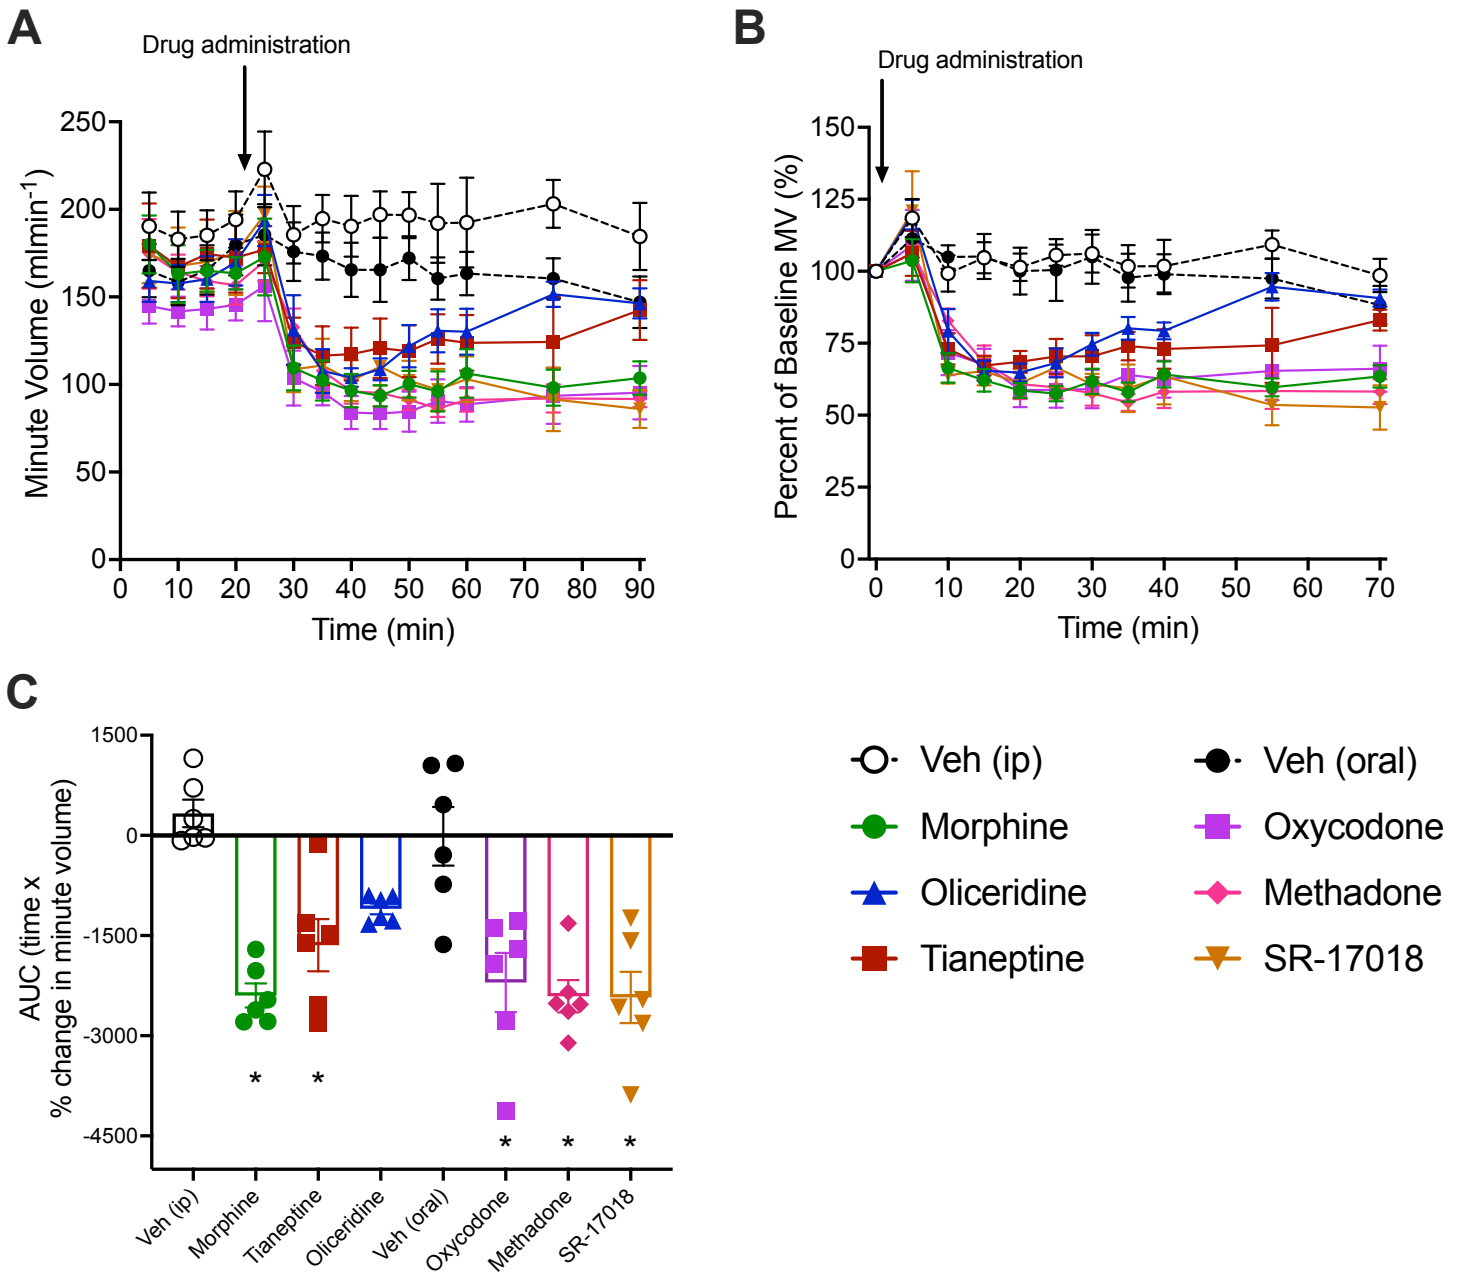

**Supplementary Figure 5. Induction of opioid respiratory depression in mice breathing 5% CO<sub>2</sub>.** Raw minute volume (ml $\cdot$ min $^{-1}$ ) (**A**), percent of baseline MV (**B**) and AUC (**C**) values for calculated equi-effective respiratory doses for morphine (3.44 mg $\cdot$ kg $^{-1}$ ), tianeptine (12.74 mg $\cdot$ kg $^{-1}$ ), oliceridine (0.745 mg $\cdot$ kg $^{-1}$ ), oxycodone (0.71 mg $\cdot$ kg $^{-1}$ ), methadone (2.5 mg $\cdot$ kg $^{-1}$ ) and SR-17018 (0.66 mg $\cdot$ kg $^{-1}$ ). Comparisons in **B** were made by One-way ANOVA using Tukey's comparison. \* indicates significance to vehicle control,  $p < 0.05$ . N=6 for all groups. Statistical test details are provided in Supplementary Table 2.

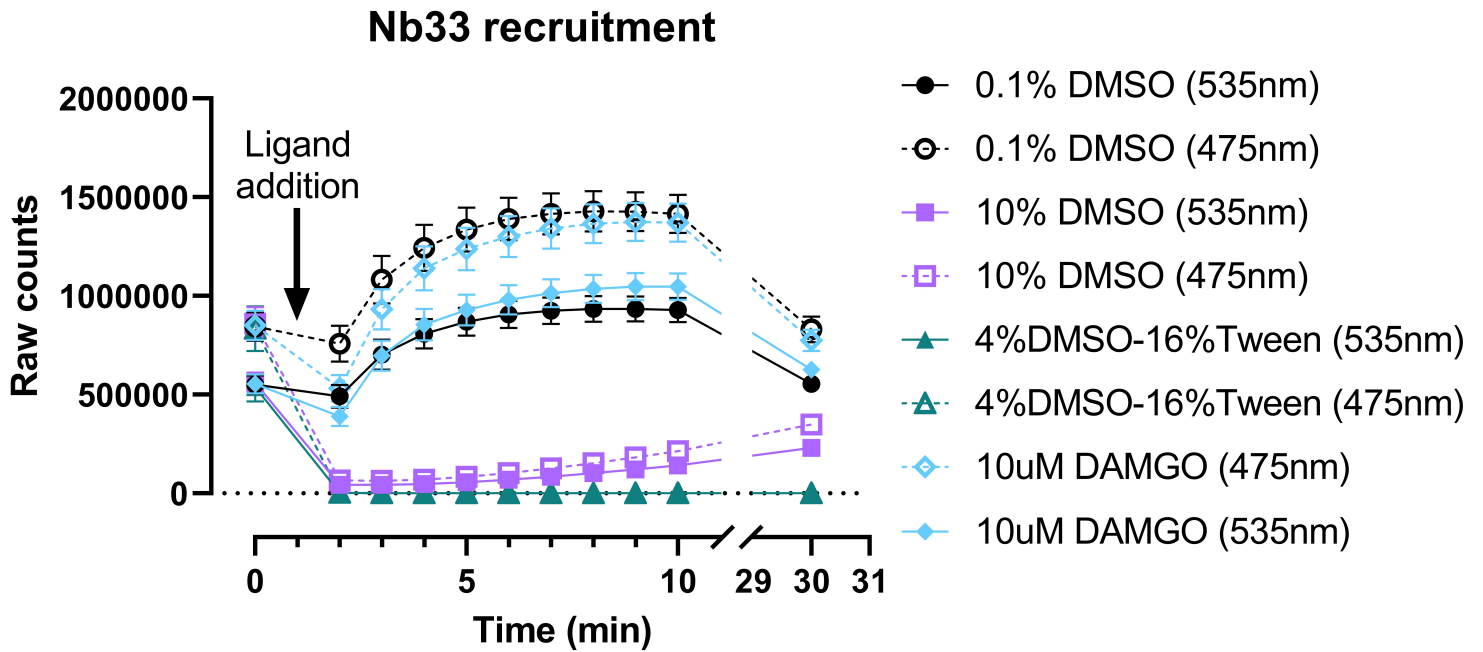

**Supplementary Figure 6. Effect of different buffers on live cell BRET measurements.** Cells were treated with 10% DMSO, 4% DMSO-16% Tween (in vivo vehicle), 0.1% DMSO (in vitro vehicle) or 10  $\mu$ M DAMGO. The effect of each addition on the raw intensity counts for both bioluminescence (475 nm) and fluorescence (535 nm) emission wavelengths was measured over time. Data show mean  $\pm$  SEM of N=6 experiments performed in duplicate.

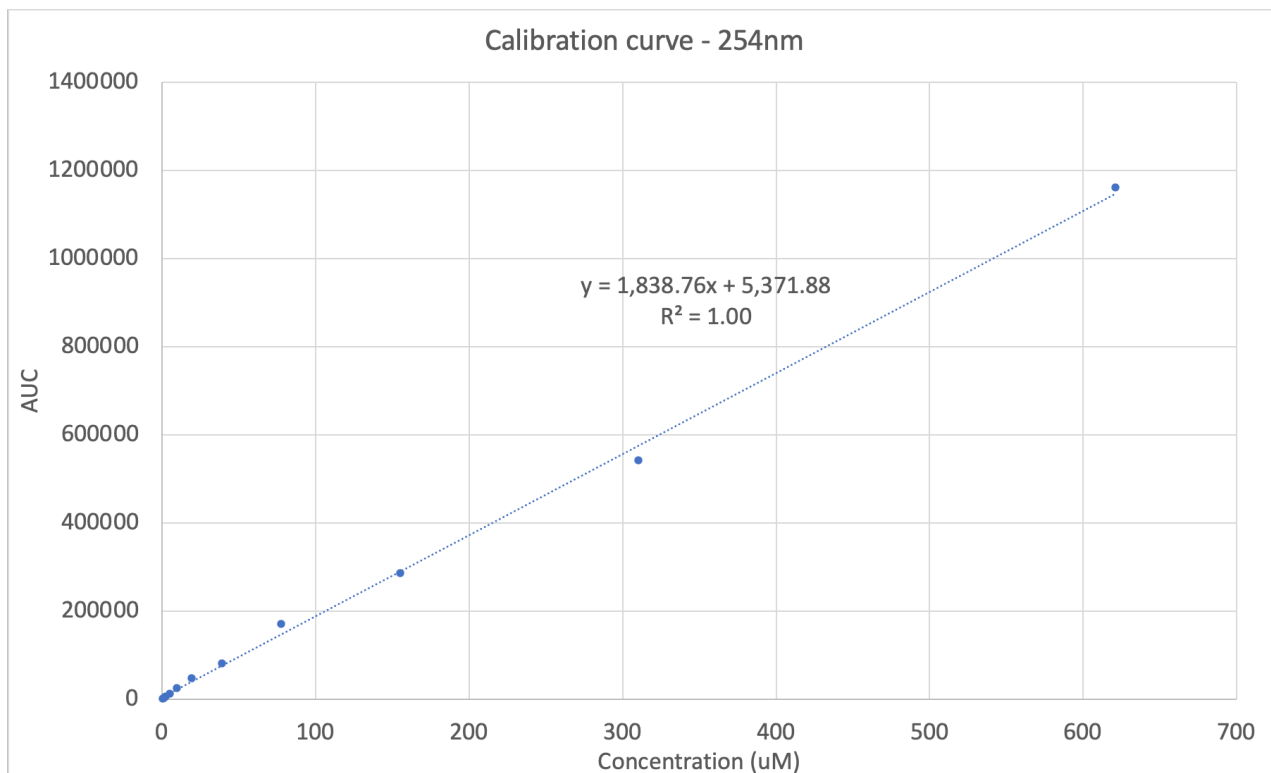

**Supplementary Figure 7. Standard calibration curves for SR-17018 in HPLC LCMS analysis** (See Materials and Methods). SR-17018 concentration range 0.61 – 620.86  $\mu\text{M}$ ; area under the curve (AUC) axis has arbitrary units.

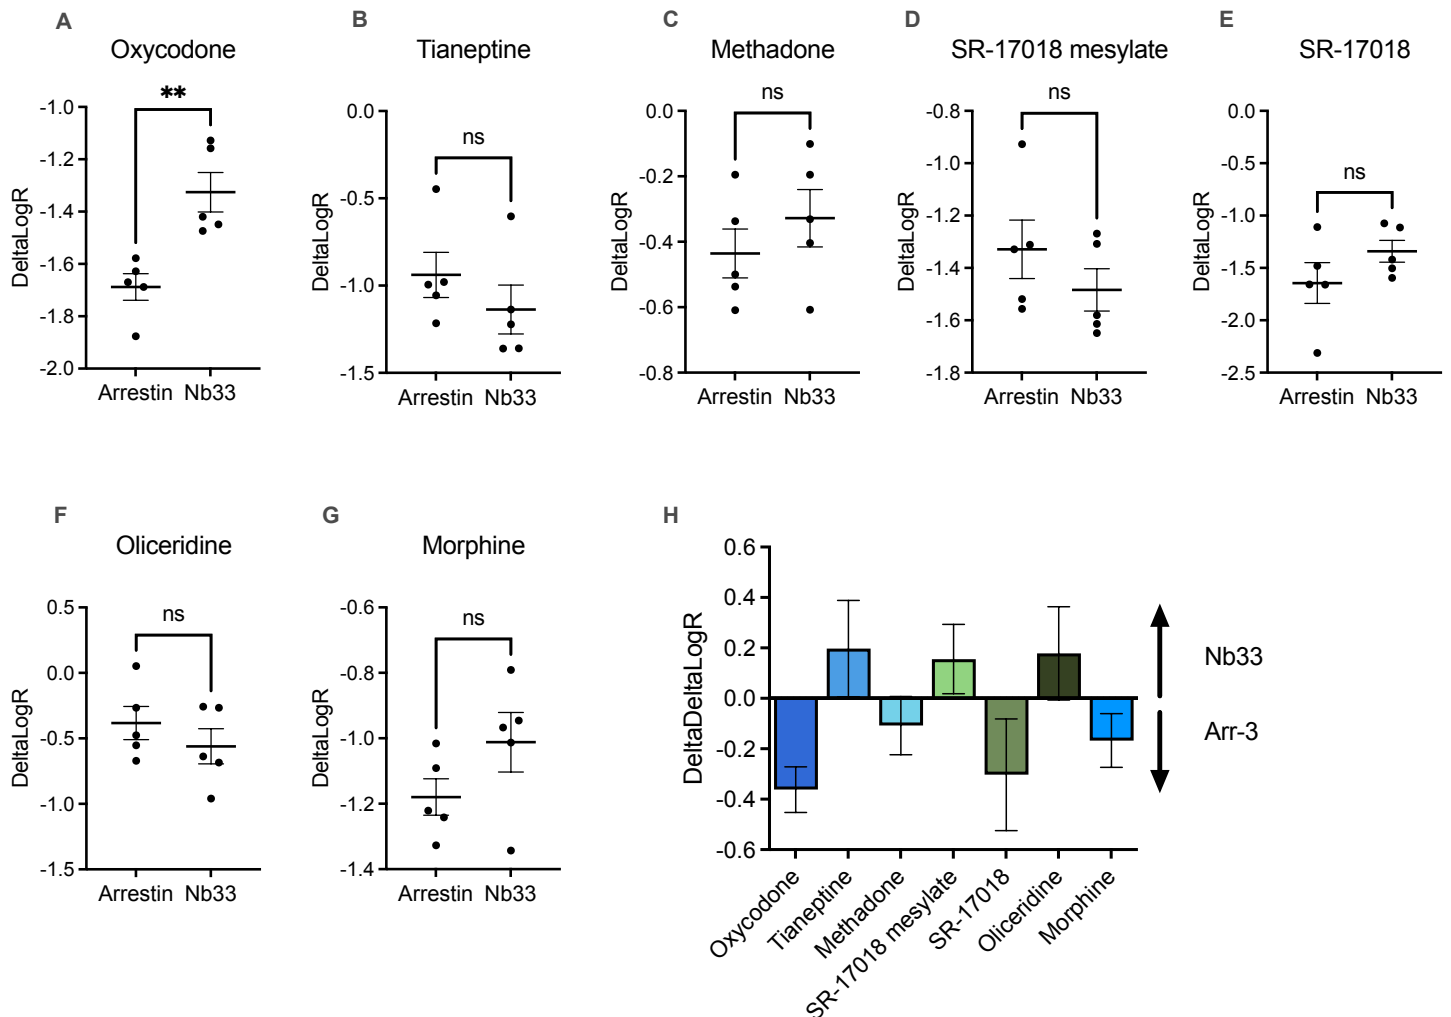

**Supplementary Figure 8. Biased agonism quantification.** Biased agonism was quantified as previously described (Kenakin et al., 2012) using predefined equations in GraphPad Prism 9.5.0 to determine transduction coefficients ( $\text{Log}[\tau/K_A]$ ) for each agonist at each pathway. **A-G** Normalised transduction coefficients ( $\Delta\text{Log}[\tau/K_A]$ ) for each agonist in each assay were determined by subtracting the transduction coefficient for DAMGO on the corresponding plate from the transduction coefficient of each agonist.  $\Delta\text{Log}[\tau/K_A]$  values for each agonist at each assay point were determined from 5 separate experimental repeats. These values were used to determine the mean  $\Delta\text{Log}[\tau/K_A]$  values for each agonist at each pathway. The mean  $\Delta\text{Log}[\tau/K_A]$  values for a particular agonist were compared between Nb33 and arrestin-3 recruitment using an unpaired two-tailed Students t-test, \* indicates significant difference  $p < 0.05$ . A significant difference in  $\Delta\text{Log}[\tau/K_A]$  values for a particular agonist for arrestin-3 recruitment relative to Nb33 recruitment is indicative of bias. **H**. The LogBias factor ( $\Delta\Delta\text{Log}[\tau/K_A]$ ) was determined by calculating the difference between the  $\Delta\text{Log}[\tau/K_A]$  values for each agonist between the two signalling assays.
